# Supplementary material for: Somatic Mutations Alter Interleukin Signaling Pathways in Grade II Invasive Breast Cancer Patients: An Egyptian Experience
Source: MDPI journal article supplement (doi:10.3390/cimb44120401), 2022-11-26

# Ion AmpliSeq™ Comprehensive Cancer Panel target gene list

The Ion AmpliSeq™ Comprehensive Cancer Panel targets the exons of 409 tumor suppressor genes and oncogenes frequently cited and frequently mutated. Strategically designed to interrogate coding DNA sequences and splice variants across multiple gene families simultaneously, our pathway-based gene selection profiles the mutational spectrum in cancer

driver genes and drug targets along with signaling cascades, apoptosis genes, DNA repair genes, transcription regulators, inflammatory response genes, and growth factor genes in a single assay. Additionally, this panel targets all 50 genes targeted in the focused Ion AmpliSeq™ Cancer Panel v2; these genes are indicated in dark grey cells.

|                 |               |               |               |                |                |               |                 |
|-----------------|---------------|---------------|---------------|----------------|----------------|---------------|-----------------|
| <i>ABL1</i>     | <i>AURKA</i>  | <i>BMPR1A</i> | <i>CDK4</i>   | <i>CTNNB1</i>  | <i>EPHB4</i>   | <i>FANCD2</i> | <i>FZR1</i>     |
| <i>ABL2</i>     | <i>AURKB</i>  | <i>BRAF</i>   | <i>CDK6</i>   | <i>CYLD</i>    | <i>EPHB6</i>   | <i>FANCF</i>  | <i>G6PD</i>     |
| <i>ACVR2A</i>   | <i>AURKC</i>  | <i>BRD3</i>   | <i>CDK8</i>   | <i>CYP2C19</i> | <i>ERBB2</i>   | <i>FANCG</i>  | <i>GATA1</i>    |
| <i>ADAMTS20</i> | <i>AXL</i>    | <i>BRIP1</i>  | <i>CDKN2A</i> | <i>CYP2D6</i>  | <i>ERBB3</i>   | <i>FAS</i>    | <i>GATA2</i>    |
| <i>AFF1</i>     | <i>BAI3</i>   | <i>BTB</i>    | <i>CDKN2B</i> | <i>DAXX</i>    | <i>ERBB4</i>   | <i>FBXW7</i>  | <i>GATA3</i>    |
| <i>AFF3</i>     | <i>BAP1</i>   | <i>BUB1B</i>  | <i>CDKN2C</i> | <i>DCC</i>     | <i>ERCC1</i>   | <i>FGFR1</i>  | <i>GDNF</i>     |
| <i>AKAP9</i>    | <i>BCL10</i>  | <i>CARD11</i> | <i>CEBPA</i>  | <i>DDB2</i>    | <i>ERCC2</i>   | <i>FGFR2</i>  | <i>GNA11</i>    |
| <i>AKT1</i>     | <i>BCL11A</i> | <i>CASC5</i>  | <i>CHEK1</i>  | <i>DDIT3</i>   | <i>ERCC3</i>   | <i>FGFR3</i>  | <i>GNAQ</i>     |
| <i>AKT2</i>     | <i>BCL11B</i> | <i>CBL</i>    | <i>CHEK2</i>  | <i>DDR2</i>    | <i>ERCC4</i>   | <i>FGFR4</i>  | <i>GNAS</i>     |
| <i>AKT3</i>     | <i>BCL2</i>   | <i>CCND1</i>  | <i>CIC</i>    | <i>DEK</i>     | <i>ERCC5</i>   | <i>FH</i>     | <i>GPR124</i>   |
| <i>ALK</i>      | <i>BCL2L1</i> | <i>CCND2</i>  | <i>CKS1B</i>  | <i>DICER1</i>  | <i>ERG</i>     | <i>FLCN</i>   | <i>GRM8</i>     |
| <i>APC</i>      | <i>BCL2L2</i> | <i>CCNE1</i>  | <i>CMPK1</i>  | <i>DNMT3A</i>  | <i>ESR1</i>    | <i>FLI1</i>   | <i>GUCY1A2</i>  |
| <i>AR</i>       | <i>BCL3</i>   | <i>CD79A</i>  | <i>COL1A1</i> | <i>DPYD</i>    | <i>ETS1</i>    | <i>FLT1</i>   | <i>HCAR1</i>    |
| <i>ARID1A</i>   | <i>BCL6</i>   | <i>CD79B</i>  | <i>CRBN</i>   | <i>DST</i>     | <i>ETV1</i>    | <i>FLT3</i>   | <i>HIF1A</i>    |
| <i>ARID2</i>    | <i>BCL9</i>   | <i>CDC73</i>  | <i>CREB1</i>  | <i>EGFR</i>    | <i>ETV4</i>    | <i>FLT4</i>   | <i>HLF</i>      |
| <i>ARNT</i>     | <i>BCR</i>    | <i>CDH1</i>   | <i>CREBBP</i> | <i>EML4</i>    | <i>EXT1</i>    | <i>FN1</i>    | <i>HNF1A</i>    |
| <i>ASXL1</i>    | <i>BIRC2</i>  | <i>CDH11</i>  | <i>CRKL</i>   | <i>EP300</i>   | <i>EXT2</i>    | <i>FOXL2</i>  | <i>HOOK3</i>    |
| <i>ATF1</i>     | <i>BIRC3</i>  | <i>CDH2</i>   | <i>CRTC1</i>  | <i>EP400</i>   | <i>EZH2</i>    | <i>FOXO1</i>  | <i>HRAS</i>     |
| <i>ATM</i>      | <i>BIRC5</i>  | <i>CDH20</i>  | <i>CSF1R</i>  | <i>EPHA3</i>   | <i>FAM123B</i> | <i>FOXO3</i>  | <i>HSP90AA1</i> |
| <i>ATR</i>      | <i>BLM</i>    | <i>CDH5</i>   | <i>CSMD3</i>  | <i>EPHA7</i>   | <i>FANCA</i>   | <i>FOXP1</i>  | <i>HSP90AB1</i> |
| <i>ATRX</i>     | <i>BLNK</i>   | <i>CDK12</i>  | <i>CTNNA1</i> | <i>EPHB1</i>   | <i>FANCC</i>   | <i>FOXP4</i>  | <i>ICK</i>      |

Learn more about the Ion AmpliSeq™ Comprehensive Cancer Panel at  
[lifetechnologies.com/ampliseq](https://lifetechnologies.com/ampliseq)

## Ion AmpliSeq™ Comprehensive Cancer Panel target gene list

|        |        |        |         |         |         |          |        |
|--------|--------|--------|---------|---------|---------|----------|--------|
| IDH1   | KRAS   | MLH1   | NFKB2   | PIK3C2B | RARA    | SOCS1    | TOP1   |
| IDH2   | LAMP1  | MLL    | NIN     | PIK3CA  | RB1     | SOX11    | TP53   |
| IGF1R  | LCK    | MLL2   | NKX2-1  | PIK3CB  | RECQL4  | SOX2     | TPR    |
| IGF2   | LIFR   | MLL3   | NLRP1   | PIK3CD  | REL     | SRC      | TRIM24 |
| IGF2R  | LPHN3  | MLLT10 | NOTCH1  | PIK3CG  | RET     | SSX1     | TRIM33 |
| IKBKB  | POT1   | MMP2   | NOTCH2  | PIK3R1  | RHOH    | STK11    | TRIP11 |
| IKBKE  | LPP    | MN1    | NOTCH4  | PIK3R2  | RNASEL  | STK36    | TRRAP  |
| IKZF1  | LRP1B  | MPL    | NPM1    | PIM1    | RNF2    | SUFU     | TSC1   |
| IL2    | LTF    | MRE11A | NRAS    | PKHD1   | RNF213  | SYK      | TSC2   |
| IL21R  | LTK    | MSH2   | NSD1    | PLAG1   | ROS1    | SYNE1    | TSHR   |
| IL6ST  | MAF    | MSH6   | NTRK1   | PLCG1   | RPS6KA2 | TAF1     | UBR5   |
| IL7R   | MAFB   | MTOR   | NTRK3   | PLEKHG5 | RRM1    | TAF1L    | UGT1A1 |
| ING4   | MAGEA1 | MTR    | NUMA1   | PML     | RUNX1   | TAL1     | USP9X  |
| IRF4   | MAGI1  | MTRR   | NUP214  | PMS1    | RUNX1T1 | TBX22    | VHL    |
| IRS2   | MALT1  | MUC1   | NUP98   | PMS2    | SAMD9   | TCF12    | WAS    |
| ITGA10 | MAML2  | MUTYH  | PAK3    | POU5F1  | SBDS    | TCF3     | WHSC1  |
| ITGA9  | MAP2K1 | MYB    | PALB2   | PPARG   | SDHA    | TCF7L1   | WRN    |
| ITGB2  | MAP2K2 | MYC    | PARP1   | PPP2R1A | SDHB    | TCF7L2   | WT1    |
| ITGB3  | MAP2K4 | MYCL1  | PAX3    | PRDM1   | SDHC    | TCL1A    | XPA    |
| JAK1   | MAP3K7 | MYCN   | PAX5    | PRKAR1A | SDHD    | TET1     | XPC    |
| JAK2   | MAPK1  | MYD88  | PAX7    | PRKDC   | SEPT9   | TET2     | XP01   |
| JAK3   | MAPK8  | MYH11  | PAX8    | PSIP1   | SETD2   | TFE3     | XRCC2  |
| JUN    | MARK1  | MYH9   | PBRM1   | PTCH1   | SF3B1   | TGFBR2   | ZNF384 |
| KAT6A  | MARK4  | NBN    | PBX1    | PTEN    | SGK1    | TGM7     | ZNF521 |
| KAT6B  | MBD1   | NCOA1  | PDE4DIP | PTGS2   | SH2D1A  | THBS1    |        |
| KDM5C  | MCL1   | NCOA2  | PDGFB   | PTPN11  | SMAD2   | TIMP3    |        |
| KDM6A  | MDM2   | NCOA4  | PDGFRA  | PTPRD   | SMAD4   | TLR4     |        |
| KDR    | MDM4   | NF1    | PDGFRB  | PTPRT   | SMARCA4 | TLX1     |        |
| KEAP1  | MEN1   | NF2    | PER1    | RAD50   | SMARCB1 | TNFAIP3  |        |
| KIT    | MET    | NFE2L2 | PGAP3   | RAF1    | SMO     | TNFRSF14 |        |
| KLF6   | MITF   | NFKB1  | PHOX2B  | RALGDS  | SMUG1   | TNK2     |        |

Learn more about the Ion AmpliSeq™ Comprehensive Cancer Panel at [lifetechnologies.com/ampliseq](https://lifetechnologies.com/ampliseq)

**FOR RESEARCH USE ONLY. NOT INTENDED FOR DIAGNOSTIC PROCEDURES.**  
 ©2012 Life Technologies Corporation. All rights reserved. The trademarks mentioned herein are the property of Life Technologies Corporation and/or its affiliate(s) or their respective owners. C025560 0812

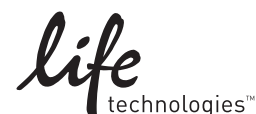

Supplement: s1 [file s1]
